# Supplementary material for: Gene Expression in the Scleractinian Acropora microphthalma Exposed to High Solar Irradiance Reveals Elements of Photoprotection and Coral Bleaching
Source: PLoS One. 2010 Nov 12;5(11):e13975. doi: 10.1371/journal.pone.0013975 (PMC2980464; doi:10.1371/journal.pone.0013975)
Supplement: Figure S2 — Profile of gene expression in A. microphthalma exposed to high solar irradiance. (0.04 MB XLS) [file pone.0013975.s002.xls]

## Sheet: Sheet1
CLONE	EST Acc	KEGG KO hit	GenBank nucleotide "nt" database hit	BRITE description	Function
WD001	AJ928558	no KEGG ortholog	similar to actin-like 6A	Chromosome	ACTL6A, INO80K; actin-like protein 6A
WD001	AJ928917	no KEGG ortholog	protein tyrosine phosphatase	Enzymes	protein-tyrosine phosphatase
WD001	AJ927040	K05692: ACTB_G1; actin beta/gamma 1	actin mRNA	Cytoskeleton proteins	ACTF; actin, other eukaryote
WD001	AJ927674	no KEGG ortholog	ribosomal protein L27a, mRNA	Ribosome	RP-L27Ae, RPL27A; large subunit ribosomal protein L27Ae
WD001	AJ927164	K00162: PDHB, pdhB; pyruvate dehydrogenase E1 component subunit beta [EC:1.2.4.1]	hypothetical protein/ribosome biogenesis protein TSR1	Ribosome	ribosome biogenesis protein TSR1
WD001	AJ926556	K02873: RP-L13e, RPL13; large subunit ribosomal protein L13e	ribosomal protein L13 (RPL13), mRNA	Ribosome	RP-L13e, RPL13; large subunit ribosomal protein L13e
WD029	AJ926973	no KEGG ortholog	hypothetical protein	Hypothetical	hypothetical protein
WD029	AJ928553	no KEGG ortholog	CE5 protein-like	Cellular antigens	CDW52; CDW52 antigen
WD029	AJ927929	no KEGG ortholog	eukaryotic translation initiation factor 3 (subunit 8)	Translation factors	eIF-38, EIF3S8; translation initiation factor eIF-3 subunit 8
WD029	GD184315	no KEGG ortholog	connections to ubiquitin and the ubiquitination pathway	Ubiquitin system	BTBD14; BTB/POZ domain-containing protein 14
WD029	AJ926976	K02977: RP-S27Ae, RPS27A; small subunit ribosomal protein S27Ae	similar to ubiquitin and ribosomal protein S27a, mRNA	Ribosome	RP-S27Ae, RPS27A; small subunit ribosomal protein S27Ae
WD029	AJ926236	K01376: E3.4.22.-	cysteine proteinase	Hypothetical	Unclassified, Metabolism
WD029	AJ928917	no KEGG ortholog	protein tyrosine phosphatase	Enzymes	protein-tyrosine phosphatase
WD029	AJ926969	K00235: SDHB, SDH2; succinate dehydrogenase (ubiquinone) iron-sulfur protein [EC:1.3.5.1]	succinate dehydrogenase [ubiquinone] iron-sulfur protein, mRNA	Enzymes	SDHB, SDH2; succinate dehydrogenase (ubiquinone) iron-sulfur protein
WD029	AJ928559	no KEGG ortholog	mRNA export protein	RNA degradation	mRNA export protein
WD029	AJ927905	no KEGG ortholog	hypothetical protein	Hypothetical	hypothetical protein
WD029	AJ927904	no KEGG ortholog	Tpr-related protein family member	Chaperones and folding catalysts	Tpr-related protein family member
WD029	AJ927934	no KEGG ortholog	similar to eukaryotic translation elongation factor 1 alpha 1	Translation factors	eEF-1A, ef1A; elongation factor EF-1 alpha subunit
WD029	EG551312	no KEGG ortholog	mRNA for RS2 protein	Ribosome	mRNA for RS2 protein
WD029	AJ926949	no KEGG ortholog	heterogeneous nuclear ribonucleoprotein K isoform a	Genetic Information Processing	HNRNPK; heterogeneous nuclear ribonucleoprotein K
WD029	EG551438	K02927: RP-L40e, RPL40; large subunit ribosomal protein L40e	UBQ11 (UBIQUITIN 11); protein binding	Ribosome	RP-S27Ae, RPS27A; small subunit ribosomal protein S27Ae
WD029	AJ926429	no KEGG ortholog	coiled-coil domain containing 64 (CCDC64), mRNA	Hypothetical	coiled-coil domain containing 64 (CCDC64)
WD029	EG551286	no KEGG ortholog	Thioredoxin I, putative	Enzymes	trxA; thioredoxin 1
WD029	AJ927925	no KEGG ortholog	similar to RAN binding protein 5	GTP-binding proteins	similar to RAN binding protein 5
WD029	EG551439	K02893: RP-L23Ae, RPL23A; large subunit ribosomal protein L23Ae	mRNA for ribosomal protein L23	Ribosome	RP-L23Ae, RPL23A; large subunit ribosomal protein L23Ae
WD029	AJ927955	no KEGG ortholog	serine/threonine protein phosphatase pp2a catalytic subunit	Enzymes	PPP2C; protein phosphatase 2 (formerly 2A), catalytic subunit
WD029	AJ927507	K02873: RP-L13e, RPL13; large subunit ribosomal protein L13e	similar to ribosomal protein L13	Ribosome	RP-L13e, RPL13; large subunit ribosomal protein L13e
WD035	DR430743	no KEGG ortholog	ubiquitin-conjugating enzyme E2 binding protein	Ubiquitin system	ARIH1; ariadne-1
WD035	CO423087	no KEGG ortholog	Gallus gallus ariadne homolog, ubiquitin-conjugating enzyme E2 binding protein, 1 (Drosophila) (ARIH1)	Ubiquitin system	ARIH1; ariadne-1
WD035	CO420026	no KEGG ortholog	Gallus gallus ariadne homolog, ubiquitin-conjugating enzyme E2 binding protein	Ubiquitin system	ARIH1; ariadne-1
WD035	AJ926936	no KEGG ortholog	aurora kinase A (AURKA), mRNA	Protein kinases	AURKA; aurora kinase A
WD035	AJ928551	K07936: RAN; GTP-binding nuclear protein Ran	small GTP-binding protein (RAN subfamily)	GTP-binding proteins	RAN; GTP-binding nuclear protein Ran
WD035	AJ928447	no KEGG ortholog	no "nt" annotation/prp gene for prion protein	Hypothetical	hypothetical protein
WD047	AJ926973	no KEGG ortholog	hypothetical protein	Hypothetical	hypothetical protein
WD047	AJ928553	no KEGG ortholog	CE5 protein-like	Cellular antigens	CDW52; CDW52 antigen
WD047	AJ927929	no KEGG ortholog	eukaryotic translation initiation factor 3 (subunit 8)	Translation factors	eIF-38, EIF3S8; translation initiation factor eIF-3 subunit 8
WD047	EG551336	K02908: RP-L30e, RPL30; large subunit ribosomal protein L30e	mRNA for ribosomal protein L30	Ribosome	RP-L30e, RPL30; large subunit ribosomal protein L30e
WD047	GD184315	no KEGG ortholog	UBA domain containing - connections to ubiquitin and the ubiquitination pathway	Ubiquitin system	BTBD14; BTB/POZ domain-containing protein 14
WD047	EG551314	no KEGG ortholog	dicarboxylate/tricarboxylate carrier	Enzymes	dicarboxylate/tricarboxylate carrier
WD047	EG551245	K08912: LHCB1; light-harvesting complex II chlorophyll a/b binding protein 1	light harvesting chlorophyll A/B binding protein	Photosynthesis proteins	LHCB1; light-harvesting complex II chlorophyll a/b binding protein 1
WD047	AJ926969	K00235: SDHB, SDH2; succinate dehydrogenase (ubiquinone) iron-sulfur protein [EC:1.3.5.1]	succinate dehydrogenase [ubiquinone] iron-sulfur protein, mRNA	Enzymes	SDHB, SDH2; succinate dehydrogenase (ubiquinone) iron-sulfur protein
WD047	AJ927897	no KEGG ortholog	heat shock 90kD protein 1, alpha (HSPCA), mRNA	Chaperones and folding catalysts	htpG, HSP90A; molecular chaperone HtpG
WD047	AJ927905	no KEGG ortholog	hypothetical protein	Hypothetical	hypothetical protein
WD047	EG550225	no KEGG ortholog	unknown plant related protein	Hypothetical	unknown plant related protein
WD047	AJ927904	no KEGG ortholog	Tpr-related protein family member	Chaperones and folding catalysts	Tpr-related protein family member
WD047	AJ926949	no KEGG ortholog	heterogeneous nuclear ribonucleoprotein K isoform a	Genetic Information Processing	HNRNPK; heterogeneous nuclear ribonucleoprotein K
WD047	DN660733	no KEGG ortholog	mRNA for elongation factor 1 alpha	Translation factors	eEF-1A, ef1A; elongation factor EF-1 alpha subunit
WD047	CF218947	no KEGG ortholog	28S ribosomal RNA gene for 28S rRNA	Ribosome	28S ribosomal RNA gene for 28S rRNA
WD047	GD184115	no KEGG ortholog	similar to arrestin domain containing 2 (ARRDC2)	Chromosome	similar to arrestin domain containing 2 (ARRDC2)
WD057	CJ456304	no KEGG ortholog	synaptotagmin I	SNAREs	synaptotagmin I
WD095	EG550602	K01803:TPI, tpiA; triosephosphate isomerase (TIM) [EC:5.3.1.1]	triosephosphate isomerase	Enzymes	TPI, tpiA; triosephosphate isomerase (TIM)
WD095	AJ928411	K02925: RP-L3e, RPL3; large subunit ribosomal protein L3e	60S ribosomal protein L3	Ribosome	RP-L3e, RPL3; large subunit ribosomal protein L3e
WD095	AJ928553	no KEGG ortholog	CE5 protein-like	Cellular antigens	CDW52; CDW52 antigen
WD095	AJ927929	no KEGG ortholog	eukaryotic translation initiation factor 3 (subunit 8)	Translation factors	eIF-38, EIF3S8; translation initiation factor eIF-3 subunit 8
WD095	BE033430	K02927: RP-L40e, RPL40; large subunit ribosomal protein L40e	ubiquitin mRNA	Ubiquitin system	ubiquitin C
WD095	AJ925881	K01897: ACSL, fadD; long-chain acyl-CoA synthetase [EC:6.2.1.3]	acyl-CoA synthetase	Lipid biosynthesis proteins	ACSL, fadD; long-chain acyl-CoA synthetase
WD095	EG549404	K02961: RP-S17, rpsQ; small subunit ribosomal protein S17	chloroplast ribosomal protein CS17	Ribosome	RP-S17, rpsQ; small subunit ribosomal protein S17
WD095	DN709168	no KEGG ortholog	myosin binding protein C, fast type	Cytoskeleton proteins	myosin binding protein C, fast type
WD095	CT747897	no KEGG ortholog	hypothetical protein	Hypothetical	hypothetical protein
WD095	AJ928407	K02966: RP-S19e, RPS19; small subunit ribosomal protein S19e	40S ribosomal protein s19	Ribosome	RP-S19e, RPS19; small subunit ribosomal protein S19e
WD095	AJ926969	K00235: SDHB, SDH2; succinate dehydrogenase (ubiquinone) iron-sulfur protein [EC:1.3.5.1]	succinate dehydrogenase [ubiquinone] iron-sulfur protein, mRNA	Enzymes	SDHB, SDH2; succinate dehydrogenase (ubiquinone) iron-sulfur protein
WD095	CJ447791	no KEGG ortholog	synaptotagmin I	SNAREs	synaptotagmin I
WD095	AJ927905	no KEGG ortholog	hypothetical protein	Hypothetical	hypothetical protein
WD095	DY575901	K10355: ACTF; actin, other eukaryote	actin, alpha 1	Cytoskeleton proteins	ACTF; actin, other eukaryote
WD095	AJ927904	no KEGG ortholog	Tpr-related protein family member	Chaperones and folding catalysts	Tpr-related protein family member
WD095	AJ926949	no KEGG ortholog	heterogeneous nuclear ribonucleoprotein K isoform a	Genetic Information Processing	HNRNPK; heterogeneous nuclear ribonucleoprotein K
WD095	DB993508	no KEGG ortholog	hypothetical protein	Hypothetical	hypothetical protein
WD095	CT741415	no KEGG ortholog	hypothetical protein	Hypothetical	hypothetical protein
WD095	AJ927925	no KEGG ortholog	similar to RAN binding protein 5	GTP-binding proteins	similar to RAN binding protein 5
WD095	CT747996	no KEGG ortholog	hypothetical protein	Hypothetical	hypothetical protein
WD095	CJ456304	no KEGG ortholog	synaptotagmin I	SNAREs	synaptotagmin I
WD095	CO388288	K12259: SMOX; spermine oxidase [EC:1.5.3.-]	spermine/polyamine oxidase	Enzymes	SMOX; spermine oxidase
WD107	EG551085	no KEGG ortholog	hypothetical protein	Hypothetical	hypothetical protein
WD107	AJ928411	K02925: RP-L3e, RPL3; large subunit ribosomal protein L3e	60S ribosomal protein L3	Ribosome	RP-L3e, RPL3; large subunit ribosomal protein L3e
WD107	AJ928553	no KEGG ortholog	CE5 protein-like	Cellular antigens	CDW52; CDW52 antigen
WD107	BE033430	K02927: RP-L40e, RPL40; large subunit ribosomal protein L40e	ubiquitin mRNA	Ubiquitin system	ubiquitin C
WD107	AJ928006	K00415: QCR2, UQCRC2; ubiquinol-cytochrome c reductase core subunit 2 [EC:1.10.2.2]	ubiquinol-cytochrome c reductase core protein II (UQCRC2), mRNA	Enzymes	QCR2, UQCRC2; ubiquinol-cytochrome c reductase core subunit 2
WD107	AJ927907	no KEGG ortholog	Tpr-related protein family member	Chaperones and folding catalysts	Tpr-related protein family member
WD107	AJ926236	K01376: E3.4.22.-	cysteine proteinase	Hypothetical	Unclassified, Metabolism
WD107	AJ928447	no KEGG ortholog	no "nt" annotation/prp gene for prion protein	Hypothetical	hypothetical protein
WD107	AJ927904	no KEGG ortholog	Tpr-related protein family member	Chaperones and folding catalysts	Tpr-related protein family member
WD107	EG551312	no KEGG ortholog	mRNA for RS2 protein	Ribosome	mRNA for RS2 protein
WD107	DN660733	no KEGG ortholog	mRNA for elongation factor 1 alpha	Translation factors	eEF-1A, ef1A; elongation factor EF-1 alpha subunit
WD107	AJ926707	no KEGG ortholog	mesoderm induction early response 1, family member 2 (MIER2), mRNA	Transcription factors	mesoderm induction early response 1, family member 2 (MIER2)
WD107	AJ927033	no KEGG ortholog	hypothetical protein	Hypothetical	hypothetical protein
WD107	AJ927507	K02873: RP-L13e, RPL13; large subunit ribosomal protein L13e	similar to ribosomal protein L13	Ribosome	RP-L13e, RPL13; large subunit ribosomal protein L13e
WD117	BM416142	no KEGG ortholog	no "nt" annotation	Hypothetical	hypothetical protein
WD117	EV236240	no KEGG ortholog	no "nt" annotation	Hypothetical	hypothetical protein
WD127	BE036811	no KEGG ortholog	unknown mRNA /putative DNA binding protein	Hypothetical	putative DNA binding protein
WD127	AJ928953	no KEGG ortholog	hypothetical protein	Hypothetical	hypothetical protein
WD127	AJ927105	no KEGG ortholog	Tpr-related protein family member	Chaperones and folding catalysts	Tpr-related protein family member
WD127	AJ927766	no KEGG ortholog	hypothetical protein	Hypothetical	hypothetical protein
WD127	AJ927923	K02684: PRI1; DNA primase small subunit [EC:2.7.7.-]	DNA primase small subunit, putative	DNA replication proteins	PRI1; DNA primase small subunit
WD127	DN718132	K10393: KIF2_24, MCAK; kinesin family member 2/24	highly similar to Kinesin-like protein KIF2	Chromosome	KIF2_24, MCAK; kinesin family member 2/24
WD127	GD184774	no KEGG ortholog	lamin B receptor	Cytoskeleton proteins	lamin B receptor
WD127	AJ925940	no KEGG ortholog	zinc finger protein mRNA	Transcription factors	zinc finger protein mRNA
WD127	BE036209	K01803: TPI, tpiA; triosephosphate isomerase (TIM) [EC:5.3.1.1]	triose phosphate isomerase cytosolic isoform mRNA/unknown mRNA	Enzymes	TPI, tpiA; triosephosphate isomerase (TIM)
WD127	AJ927140	no KEGG ortholog	hypothetical protein	Hypothetical	hypothetical protein
WD127	AJ928557	no KEGG ortholog	carbonic anhydrase VB, mitochondrial (CA5B)	Enzymes	carbonic anhydrase
WD127	AJ927925	no KEGG ortholog	similar to RAN binding protein 5	GTP-binding proteins	similar to RAN binding protein 5
WD127	AJ927086	K12862: PLRG1, PRL1, PRP46; pleiotropic regulator 1	pleiotropic regulator 1, mRNA	Genetic Information Processing	PLRG1, PRL1, PRP46; pleiotropic regulator 1
WD127	BE036899	no KEGG ortholog	unknown mRNA /putative mRNA for peroxisomal biogenesis factor 11 family protein	Hypothetical	putative mRNA for peroxisomal biogenesis factor 11 family protein
WD127	BE036800	no KEGG ortholog	hypothetical protein	Hypothetical	hypothetical protein
WD134	AJ927103	no KEGG ortholog	similar to phosphofructokinase, platelet, transcript variant 12 (PFKP), mRNA	Enzymes	PFK, pfk; 6-phosphofructokinase
WD134	AJ928565	no KEGG ortholog	similar to C11orf61 protein	Hypothetical	similar to C11orf61 protein
WD134	AJ926973	no KEGG ortholog	hypothetical protein	Hypothetical	hypothetical protein
WD134	AJ928553	no KEGG ortholog	CE5 protein-like	Cellular antigens	CDW52; CDW52 antigen
WD134	AJ927929	no KEGG ortholog	eukaryotic translation initiation factor 3 (subunit 8)	Translation factors	eIF-38, EIF3S8; translation initiation factor eIF-3 subunit 8
WD134	AJ927956	K02930: RP-L4e, RPL4; large subunit ribosomal protein L4e	ribosomal protein L4, mRNA	Ribosome	RP-L4e, RPL4; large subunit ribosomal protein L4e
WD134	AJ926642	no KEGG ortholog	disrupter of silencing (SAS10 ) (TA06790) mRNA	Transcription factors	disrupter of silencing (SAS10 ) (TA06790) mRNA
WD134	AJ927984	no KEGG ortholog	ubiquitin-protein ligase	Enzymes	ubiquitin-protein ligase
WD134	AJ927905	no KEGG ortholog	hypothetical protein	Hypothetical	hypothetical protein
WD134	AJ927904	no KEGG ortholog	Tpr-related protein family member	Chaperones and folding catalysts	Tpr-related protein family member
WD134	AJ927955	no KEGG ortholog	serine/threonine protein phosphatase pp2a catalytic subunit	Enzymes	PPP2C; protein phosphatase 2 (formerly 2A), catalytic subunit
WD134	AJ926707	no KEGG ortholog	mesoderm induction early response 1, family member 2 (MIER2), mRNA	Transcription factors	mesoderm induction early response 1, family member 2 (MIER2)
WD134	AJ927033	no KEGG ortholog	hypothetical protein	Hypothetical	hypothetical protein
WD145	DV791856	no KEGG ortholog	no "nt" annotation	Hypothetical	hypothetical protein
WD151	CO387234	no KEGG ortholog	suppressor of Ty 6 homolog	Chromosome	SUPT6H, SPT6; transcription elongation factor SPT6
WD151	AJ927629	K00235: SDHB, SDH2; succinate dehydrogenase (ubiquinone) iron-sulfur protein [EC:1.3.5.1]	succinate dehydrogenase [ubiquinone] iron-sulfur protein	Enzymes	SDHB, SDH2; succinate dehydrogenase (ubiquinone) iron-sulfur protein
WD151	CO423087	no KEGG ortholog	Gallus gallus ariadne homolog, ubiquitin-conjugating enzyme E2 binding protein, 1 (Drosophila) (ARIH1)	Ubiquitin system	ARIH1; ariadne-1
WD151	EG551245	K08912: LHCB1; light-harvesting complex II chlorophyll a/b binding protein 1	light harvesting chlorophyll A/B binding protein	Photosynthesis proteins	LHCB1; light-harvesting complex II chlorophyll a/b binding protein 1
WD151	AJ927622	no KEGG ortholog	LAG1 homolog, ceramide synthase 2 (LASS2), mRNA - longevity assurance 2-like protein	Chromosome	SETDB; histone-lysine N-methyltransferase SETDB
WD151	BE036666	K02920: RP-L36e, RPL36; large subunit ribosomal protein L36e	ribosomal protein L36, mRNA	Ribosome	RPL36; large subunit ribosomal protein L36e
WD151	AJ928447	no KEGG ortholog	no "nt" annotation/prp gene for prion protein	Hypothetical	hypothetical protein
WD151	AJ928559	no KEGG ortholog	mRNA export protein	RNA degradation	mRNA export protein
WD151	AJ927905	no KEGG ortholog	hypothetical protein	Hypothetical	hypothetical protein
WD151	AJ926949	no KEGG ortholog	heterogeneous nuclear ribonucleoprotein K isoform a	Genetic Information Processing	HNRNPK; heterogeneous nuclear ribonucleoprotein K
WD151	DB993508	no KEGG ortholog	hypothetical protein	Hypothetical	hypothetical protein
WD151	CN023319	K03038: PSMD7, RPN8; 26S proteasome regulatory subunit N8	proteasome subunit	Ubiquitin system	PSMD7, RPN8; 26S proteasome regulatory subunit N8
WD151	DN562210	no KEGG ortholog	mitochondrial 16S ribosomal RNA	Ribosome	mitochondrial 16S ribosomal RNA
WD151	EG549981	K02961: RP-S17, rpsQ; small subunit ribosomal protein S17	chloroplast ribosomal protein S17	Ribosome	RP-S17, rpsQ; small subunit ribosomal protein S17
